# Supplementary material for: Los sudaneses del sur cogen en mano su destino.
Source: JCI journal article supplement (doi:10.1172/jci.insight.88955), 2011-01-01
Supplement: sd1 [file 1]

Supplementary Table S1. CyTOF antibody panel.

| CyTOF Antibodies |           |        |
|------------------|-----------|--------|
| Name             | Clone     | Metal  |
| CD45             | HI30      | 89 Y   |
| B7H3             | MIH42     | 141 Pr |
| CD19             | HIB19     | 142 Nd |
| C-kit            | 104D2     | 143 Nd |
| CD27             | 0323      | 144 Nd |
| CD4              | RPA-T4    | 145 Nd |
| CD8              | RPA-T8    | 146 Nd |
| CD11c            | Bu15      | 147 Sm |
| CD14             | RMO52     | 148 Nd |
| CD25             | 2A3       | 149 Sm |
| CD103            | Ber-ACT8  | 151 Eu |
| TIM3             | F38-2E2   | 153 Eu |
| CD3              | UCHT1     | 154 Sm |
| CXCR5            | J252D4    | 155 Gd |
| CD16             | 3G8       | 156 Gd |
| CD33             | WM53      | 158 Gd |
| CCR7             | GO43H7    | 159 Tb |
| 41BB             | 4B4-1     | 161 Dy |
| BTLA             | MIH26     | 163 Dy |
| CD95             | DX2       | 164 Dy |
| CD45RO           | UCHL1     | 165 Ho |
| HLADR            | L243      | 166 Er |
| CD69             | FN50      | 169 Tm |
| CTLA4            | 14D3      | 170 Er |
| CD38             | HIT2      | 172 Yb |
| ICOS             | DX29      | 173 Yb |
| PDL1             | MIH1      | 174 Yb |
| PD1              | EH12.2H7  | 175 Lu |
| CD56             | CMSSB     | 176 Yb |
| PLZF             | Mags.21F7 | 152 Sm |
| GATA3            | TWAJ      | 167 Er |
| Ki67             | Ki-67     | 168 Er |
| TBET             | 4B10      | 160 Gd |
| Foxp3            | PCH101    | 162 Dy |
| Granzyme         | GB11      | 171 Yb |

Figure S1

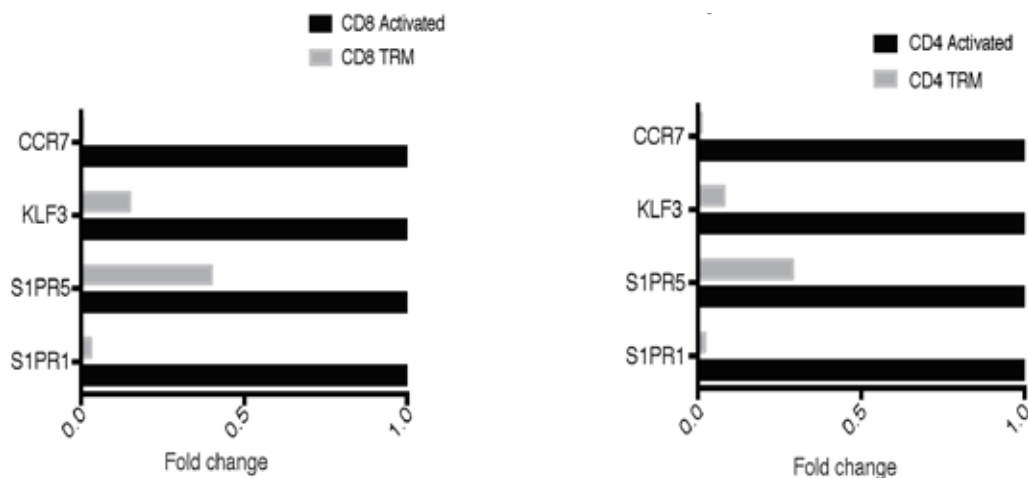

**Supplementary Figure S1: Expression of genes implicated in tissue retention in  $T_{RM}$  cells versus circulating T cells activated in vitro.** CD4 and CD8  $T_{RM}$  cells were sorted from tumor tissue. T cells obtained from peripheral blood were stimulated in vitro with anti-CD3/28 beads and CD69+ activated CD4 and CD8 T cells were flowsorted. RNA was obtained and gene expression was analyzed using affymetrix U133 plus 2 array. Panel on the left shows expression of genes implicated in tissue retention in tumor CD8  $T_{RM}$  cells versus circulating CD8 T cells activated in-vitro with CD3/28 (CD69+ sorted). Panel on the right shows expression of genes implicated in tissue retention in tumor CD4  $T_{RM}$  cells compared to circulating CD4 T cells activated in-vitro with anti-CD3/28 (69+ sorted). Both panels shows fold change compared to activated T cells.

Figure S2

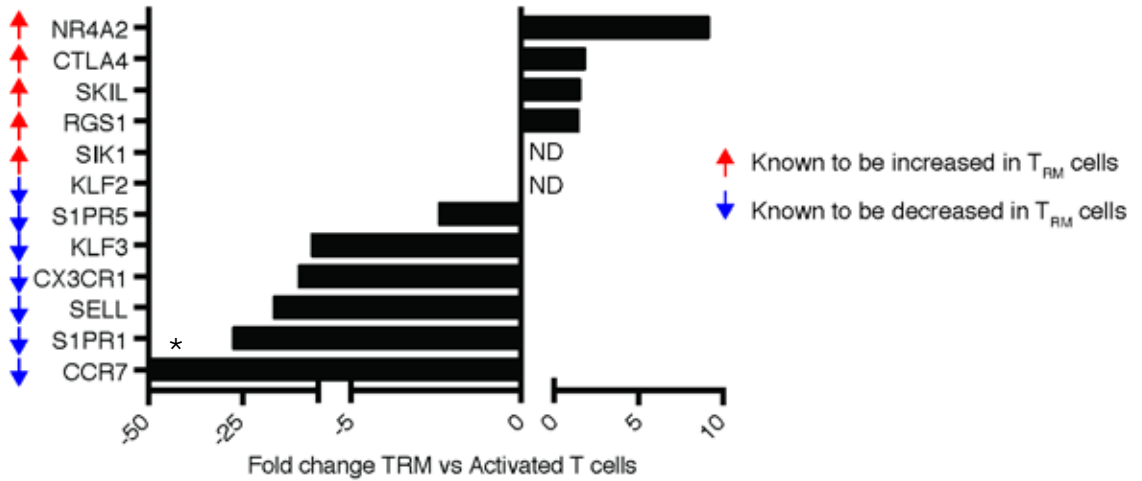

**Supplementary Figure S2: Expression of core T<sub>RM</sub> genes in CD8T<sub>RM</sub> cells versus circulating CD8 T cells activated in vitro.** CD8 T<sub>RM</sub> cells were sorted from tumor tissue. T cells obtained from peripheral blood were stimulated in vitro with anti-CD3/28 beads and CD69+ activated CD8 T cells were flow sorted. RNA was obtained and gene expression was analyzed using affymetrix U133 plus 2 array. Figure shows expression (fold change) of previously described murine core T<sub>RM</sub> genes in human CD8 T<sub>RM</sub> cells isolated from melanoma tumor compared to circulating CD8 T cells activated in vitro using anti-CD3/28 beads (sorted 69+ CD8 T cells). \* -157 fold, ND=no difference.

Figure S3

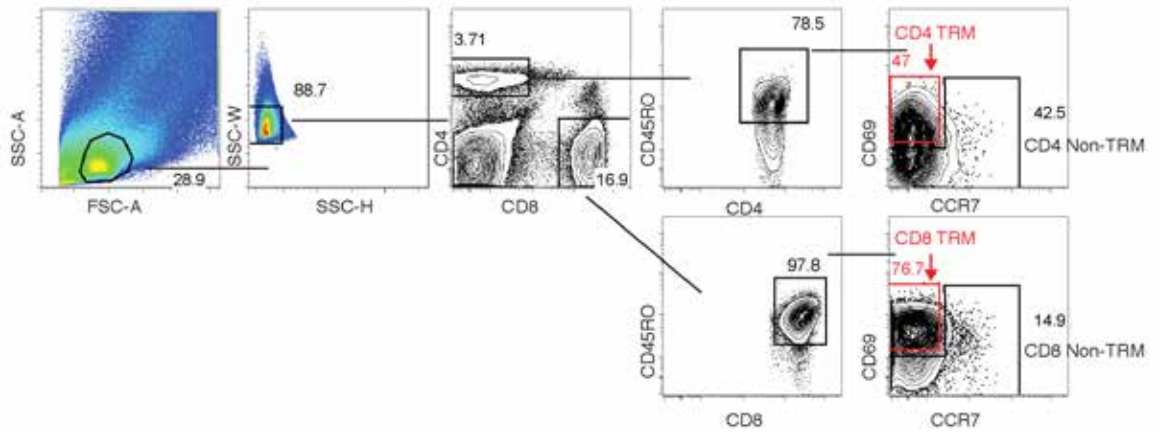

**Supplementary Figure S3: Gating strategy used to sort T<sub>RM</sub> and Non-T<sub>RM</sub> cells from tumor tissue.** Facs plot shows the sequential gating strategy used to sort T<sub>RM</sub> and Non-T<sub>RM</sub> cells from melanoma tumor tissue.

Figure S4

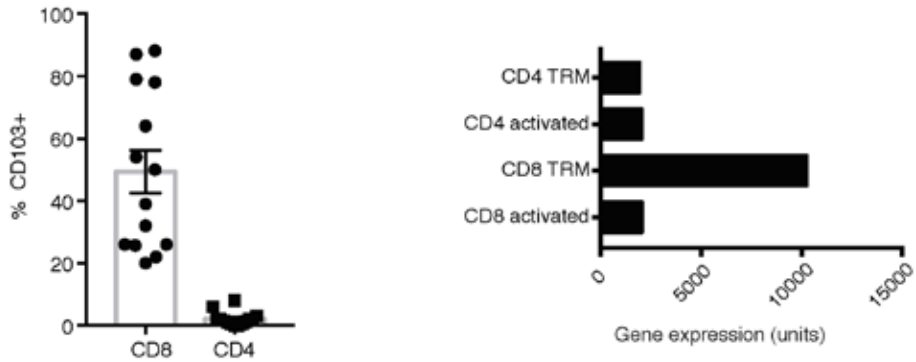

**Supplementary Figure S4: Expression of CD103 is enriched in tumor CD8 T<sub>RM</sub> cells.** Panel on the left shows % of CD8 T<sub>RM</sub> and CD4 T<sub>RM</sub> cells from tumor tissue that express CD103 as determined using CyTOF. Panel on the right shows gene expression of ITGAE (CD103) in CD8 T<sub>RM</sub> and CD4 T<sub>RM</sub> from tumor compared to CD8 and CD4 circulating T cells activated in-vitro with anti-CD3/28.

Figure S5

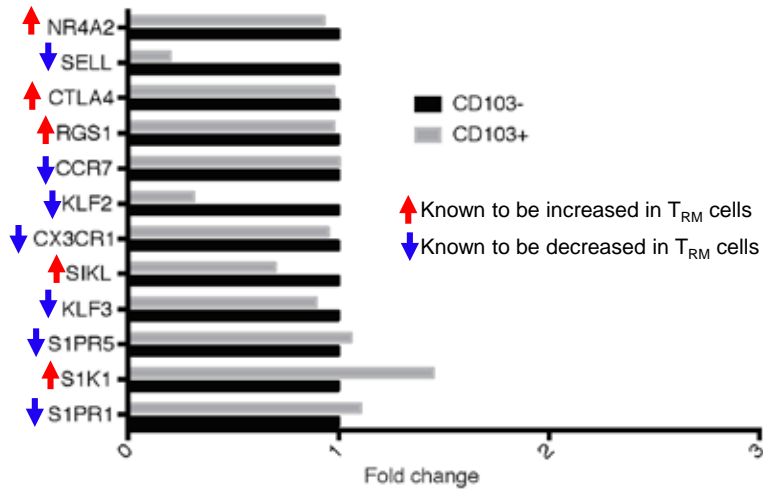

**Supplementary Figure S5: Expression of core murine T<sub>RM</sub> genes in CD103+ and CD103- tumor associated CD8 T<sub>RM</sub> cells.** Bar graph shows expression of previously described murine core T<sub>RM</sub> genes in human CD103+ and CD103- CD8 T<sub>RM</sub> cells isolated from melanoma tumor. Figure shows fold change compared to CD103- cells T<sub>RM</sub> cells.
